# Supplementary material for: miR-155 Deletion in Female Mice Prevents Diet-Induced Obesity
Source: PubMed Central journal article supplement (PMC4782173; doi:10.1038/srep22862), 2016-03-08
Supplement: srep22862-s1.pdf [file srep22862-s1.pdf]

*Supplementary Information File*

**microRNA-155 Deletion in Female Mice Prevents Diet-Induced Obesity**

Andrew D. Gaudet\*, Laura K. Fonken\*, Liubov V. Gushchina, Taryn G. Aubrecht,  
Santosh K. Maurya, Muthu Periasamy, Randy J. Nelson, and Phillip G. Popovich

### Non-littermate pilot study

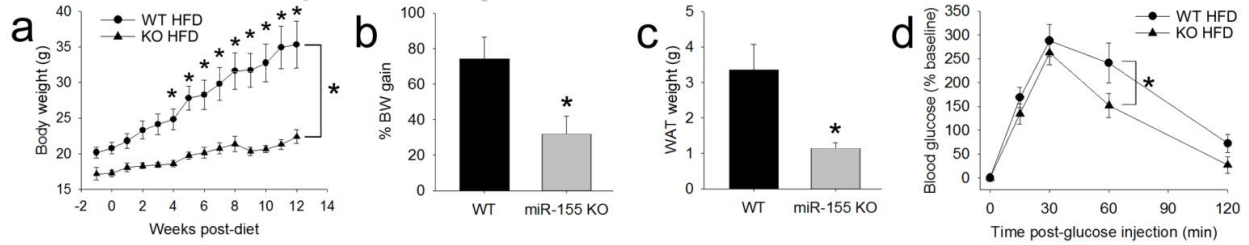

### Developmental weight gain

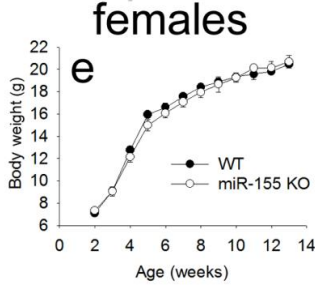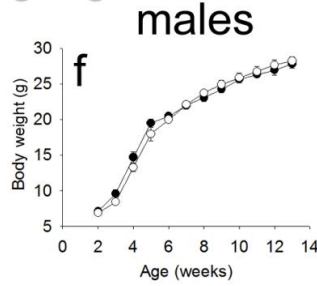

### miR-155-5p deletion

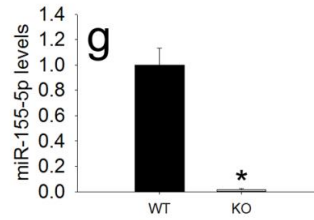

**Supplemental Figure S1.** A pilot experiment using female mice derived from WT or KO parents (not littermates) that led to studying littermates from heterozygote parents using CD and HFD (see Fig. 1); and developmental weight gain in littermate WT and KO mice. After noting that miR-155 KO mice from KO parents weighed less than WT mice, we placed mice on HFD. (a) miR-155 KO mice gained significantly less BW on HFD than WT mice. miR-155 KO mice on HFD weighed significantly less than HFD WT mice from 4-12 weeks after HFD start. Overall, miR-155 KO HFD mice weighed significantly less than WT HFD mice. (b) miR-155 KO mice gained significantly less weight from the start of the experiment. (c) Gonadal WAT from miR-155 KO mice weighed significantly less than WT WAT. (d) miR-155 KO mice on HFD recovered from glucose challenge significantly faster than WT mice. (e,f) Developmental weight gain was similar in WT and miR-155 KO mice (females, e; males, f) from heterozygote parents. (g) miR-155-5p was not expressed in WAT from female KO mice. \* indicates  $p < 0.05$ .

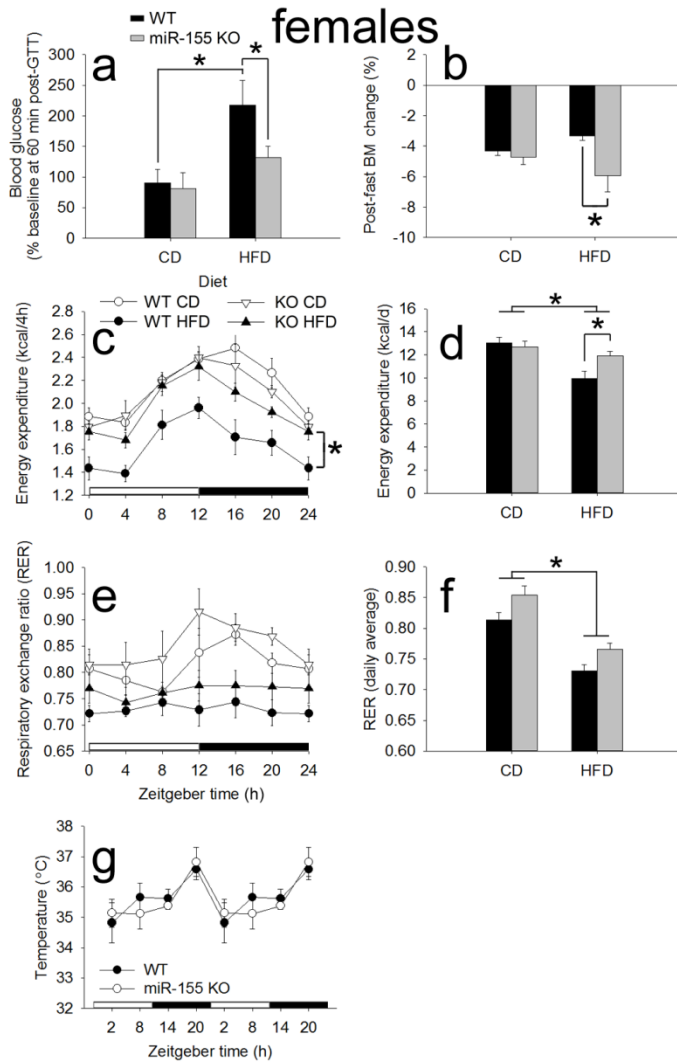

**Supplemental Figure S2.** Female miR-155 KO mice display altered energetics and metabolism (see also Fig. 3). In Fig. 3e-h, only HFD data are presented for clarity. Here, CD and HFD data are presented together. (a) Compared to WT mice, miR-155 KO mice fed HFD improved glucose clearance. At 60 min post-glucose challenge, miR-155 KO mice fed HFD improved glucose clearance by 39%. (b) After overnight fast, miR-155 KO mice had exaggerated BW loss compared to WT mice (HFD only). (c,d) Compared to WT mice, miR-155 KO mice fed HFD increased energy expenditure. (e,f) Respiratory exchange ratio was reduced in mice fed HFD; however, there were no significant differences in respiratory exchange ratio between genotypes. (g) Female miR-155 KO mice did not have significantly altered rectal temperature throughout the day.

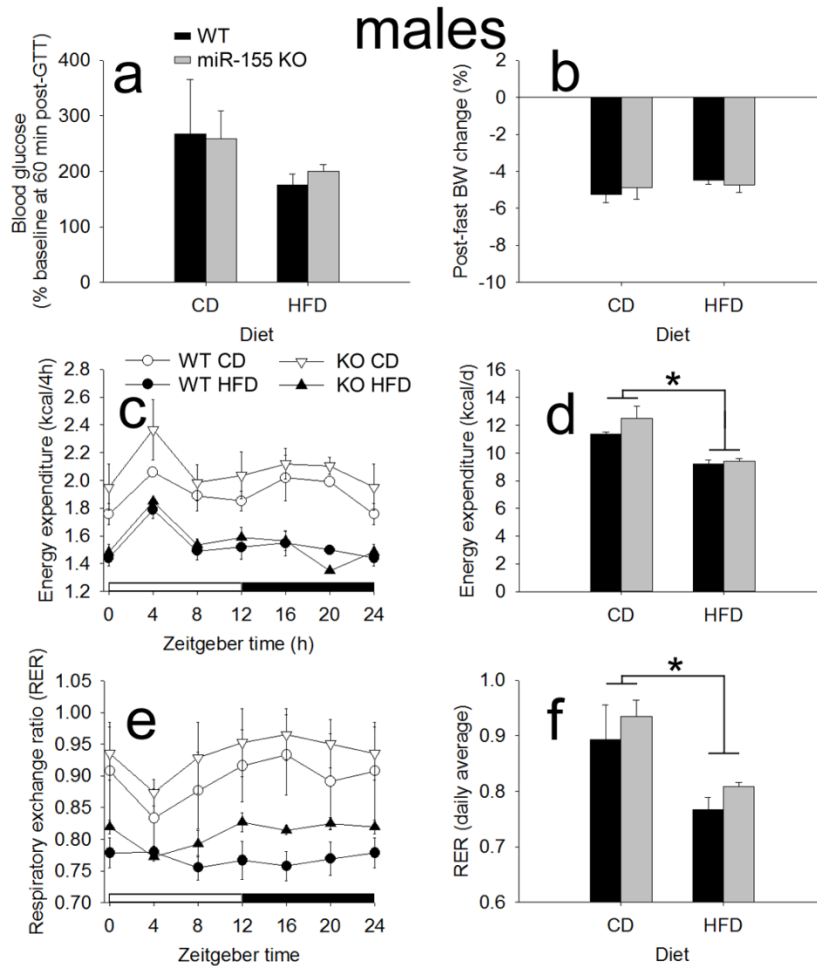

**Supplemental Figure S3.** Male miR-155 KO mice do not show altered energetics and metabolism (see also Fig. 3). In Fig. 3m-p, only HFD data are presented for clarity. Here, CD and HFD data are presented together. (a) WT and miR-155 KO mice had similar glucose clearance. (b) After overnight fast, WT and miR-155 KO mice had similar BW loss. (c,d) Energy expenditure was not significantly different between genotypes. (e,f) Respiratory exchange ratio was reduced in mice fed HFD; however, there were no significant differences in respiratory exchange ratio between genotypes.

**Supplementary Information: Gaudet et al., miR-155 deletion reduces diet-induced obesity**

| <b>miR-155-5p validated &amp; predicted targets: A partial list</b> |                                                                                                           |                                                                                                                                   |  |                                                                                                                                                                                                                                                                                                                                                                                                                                                                                                                                                                                                                                                                                                                                                                    |                                                                                                                      |                                                                                                                                                     |  |  |  |
|---------------------------------------------------------------------|-----------------------------------------------------------------------------------------------------------|-----------------------------------------------------------------------------------------------------------------------------------|--|--------------------------------------------------------------------------------------------------------------------------------------------------------------------------------------------------------------------------------------------------------------------------------------------------------------------------------------------------------------------------------------------------------------------------------------------------------------------------------------------------------------------------------------------------------------------------------------------------------------------------------------------------------------------------------------------------------------------------------------------------------------------|----------------------------------------------------------------------------------------------------------------------|-----------------------------------------------------------------------------------------------------------------------------------------------------|--|--|--|
| <b>genes in red</b> = validated targets                             |                                                                                                           | SOURCES:                                                                                                                          |  | <a href="https://cm.jefferson.edu/ma22v1.0-mus_musculus/InputController?identifier=mmu-miR-155">https://cm.jefferson.edu/ma22v1.0-mus_musculus/InputController?identifier=mmu-miR-155</a><br><a href="http://www.targetscan.org/cgi-bin/targetscan/vert_61/targetscan.cgi?mirg=mmu-miR-155">http://www.targetscan.org/cgi-bin/targetscan/vert_61/targetscan.cgi?mirg=mmu-miR-155</a><br><a href="http://www.microna.org/microna/getTargets.do?matureName=mmu-miR-155&amp;startIndex=350&amp;organism=10090">http://www.microna.org/microna/getTargets.do?matureName=mmu-miR-155&amp;startIndex=350&amp;organism=10090</a><br><a href="http://www.mirbase.org/cgi-bin/mirna_entry.pl?acc=MI0000177">http://www.mirbase.org/cgi-bin/mirna_entry.pl?acc=MI0000177</a> |                                                                                                                      |                                                                                                                                                     |  |  |  |
| <b>ADIPOGENESIS</b>                                                 |                                                                                                           |                                                                                                                                   |  | <b>MACROPHAGES</b>                                                                                                                                                                                                                                                                                                                                                                                                                                                                                                                                                                                                                                                                                                                                                 |                                                                                                                      |                                                                                                                                                     |  |  |  |
| Transcriptional regulators                                          | <b>C/EBPb</b><br><b>Creb1</b>                                                                             |                                                                                                                                   |  | Tfs controlling macrophage phenotype                                                                                                                                                                                                                                                                                                                                                                                                                                                                                                                                                                                                                                                                                                                               | <b>C/EBPb</b><br><b>Spi1</b><br><b>Creb1</b><br><b>Bel6</b><br><b>Nr1h3</b><br><b>Ppargc1b</b>                       | gene for PU.1 transcription factor                                                                                                                  |  |  |  |
| JAK/STAT pathway                                                    | <b>Socs1</b><br>Jak1<br>Jak2<br>Stat3<br>Stat5a                                                           |                                                                                                                                   |  |                                                                                                                                                                                                                                                                                                                                                                                                                                                                                                                                                                                                                                                                                                                                                                    |                                                                                                                      | LXRalpha gene<br>PPAR, gamma, coactivator 1 beta gene (PGC1beta)                                                                                    |  |  |  |
| Insulin signaling                                                   | <b>Foxo1</b><br>insulin receptor<br>insulin II<br>Insig1<br>Insrr<br>Igfbp1                               |                                                                                                                                   |  | TNF signaling                                                                                                                                                                                                                                                                                                                                                                                                                                                                                                                                                                                                                                                                                                                                                      | <b>Tnfa</b><br><b>Ikbkg</b><br><b>Traf3</b>                                                                          | miR-155 increases TNFa<br>inhibitor of kappaB kinase gamma gene<br>TNF receptor-associated factor 3 gene                                            |  |  |  |
|                                                                     |                                                                                                           |                                                                                                                                   |  | TGF signaling                                                                                                                                                                                                                                                                                                                                                                                                                                                                                                                                                                                                                                                                                                                                                      | <b>Tgfbeta</b><br><b>receptor 2</b><br><b>Tgf alpha</b><br><b>Tgfbbr1</b>                                            | TGF, beta receptor 1 gene                                                                                                                           |  |  |  |
| Leptin signaling                                                    | Lepr<br>Leprot                                                                                            |                                                                                                                                   |  | Other, pro-inflammatory                                                                                                                                                                                                                                                                                                                                                                                                                                                                                                                                                                                                                                                                                                                                            | <b>IL-12 receptor beta 1</b><br><b>MMP-12</b><br><b>Ccr7</b>                                                         | various MMPs, ADAMs, ADAM-TS                                                                                                                        |  |  |  |
| Steroid-related                                                     | Esr1<br>Esrra<br>Pgr<br>Pgrmc1<br>Gmeb1<br>Trip13                                                         |                                                                                                                                   |  | Other, anti-inflammatory                                                                                                                                                                                                                                                                                                                                                                                                                                                                                                                                                                                                                                                                                                                                           | <b>IL-13Ra1</b><br><b>Msr1</b><br><b>Cd200r3</b><br><b>CD200</b><br><b>IL-4Ra</b><br><b>Mrc1, 2</b><br><b>Adpor1</b> | Macrophage scavenger receptor 1 (Msr1)<br>CD200 receptor 3 gene<br>IL-4Ra<br>mannose receptor, C type 1 gene (and 2)<br>adiponectin receptor 1 gene |  |  |  |
| Other                                                               | <b>Tnfa</b><br><b>Rheb</b><br>lipoprotein lipase<br>Lrp8<br>Adiponectin receptor<br>Mc5r<br>ApoB<br>Lpin1 | miR-155 increases TNFa<br>LDL receptor-related protein 8<br>melanocortin 5 receptor gene<br>apolipoprotein B gene<br>lipin 1 gene |  | Other, potentially important                                                                                                                                                                                                                                                                                                                                                                                                                                                                                                                                                                                                                                                                                                                                       | <b>Rheb</b><br><b>HMGB1</b><br><b>SHIP1</b><br><b>Socs1</b><br><b>FGF-6</b><br><b>P2rx7</b><br><b>P2rx4</b>          |                                                                                                                                                     |  |  |  |

From: Gaudet et al.  
*microRNA-155 Deletion in Female Mice Prevents Diet-Induced Obesity*

**Supplemental Table S1.** miR-155-5p validated (red) and predicted mRNA targets. Analysis of potential targets were performed using TargetsCan.org, microrna.org, mirbase.org, and the microRNA resource from Thomas Jefferson University. Validated targets were identified in published studies (see text for citations).
